# Supplementary material
Source: ML conference proceedings conference paper supplement (https://openreview.net/forum?id=a06UO11IrQ)
Supplement: supplementary_material [file attachment]

# Supplementary Material

This material provides additional tables and figures that support the rebuttal of our paper. Below is a brief description of each item:

1. **Table1** extends our experiments by incorporating an established Tabular Benchmark.
2. **Figure1** visualizes the raw and transformed data distributions using t-SNE.
3. **Figure2** explores the impact of class imbalance on Meta-representations.

| Datasets                                                           | Dummy        | KNN          | SVM          | XGB          | CatB         | RF           | MLP          | ResNet       | Node         | Switch/Tab   | TabNet | Tangos | DANets | FTT          | AutoInt | DCNV2        | SNN    | TabTrans     | PTaRL        | GrowNet | TabR         | Excel        | ModernNCA    | TuneTables   | TabPFN       | LoCalPFN     | TabPTM       |
|--------------------------------------------------------------------|--------------|--------------|--------------|--------------|--------------|--------------|--------------|--------------|--------------|--------------|--------|--------|--------|--------------|---------|--------------|--------|--------------|--------------|---------|--------------|--------------|--------------|--------------|--------------|--------------|--------------|
| FOREX_audchf-day-High                                              | .5068        | .5940        | .7520        | .6627        | .6398        | .6554        | .6901        | .7464        | .6523        | .5135        | .5010  | .5370  | .5179  | .6567        | .7480   | .7262        | .7424  | .6191        | .6754        | .7520   | .5297        | .7544        | <b>.7570</b> | <u>.7559</u> | .7540        | .6095        |              |
| taiwanese_bankruptcy_prediction                                    | .9677        | .9714        | .9677        | .9702        | <b>.9718</b> | <u>.9717</u> | .9685        | .9667        | .9678        | .9522        | .9681  | .9689  | .9686  | .9674        | .9674   | .9662        | .9664  | .9686        | .9670        | .9660   | .9678        | .9669        | .9674        | .9680        | .9692        | .9696        | .9675        |
| pc                                                                 | .5000        | .6549        | .6308        | .7993        | .7858        | .7295        | .6562        | .6592        | .6475        | .6227        | .6281  | .6596  | .6665  | .7196        | .6822   | .6488        | .6490  | .6282        | .6429        | .6258   | <b>.8779</b> | .7168        | <u>.8335</u> | .6160        | .6738        | .6085        | .7857        |
| qsar                                                               | <u>.8978</u> | .8914        | .8871        | .8856        | .8880        | .8941        | .8820        | .8867        | <u>.8978</u> | .8835        | .8884  | .8920  | .8917  | <u>.8978</u> | .8952   | .8867        | .8929  | .8976        | .8909        | .8963   | .8846        | .8969        | .8892        | <b>.8980</b> | .8950        | .8965        | .8978        |
| eye_movements_bin                                                  | .6635        | .8057        | .8464        | .8673        | .8613        | .8708        | .8654        | .8894        | .6768        | .8657        | .7912  | .8970  | .8537  | .8641        | .8720   | .8720        | .8761  | .8720        | .8569        | .8569   | .7953        | .8635        | .9000        | <u>.9087</u> | <b>.9115</b> | .8768        |              |
| BNG(breast-w)                                                      | .5000        | .5802        | .5558        | .6325        | .6152        | .6057        | .5708        | .5754        | .5611        | .5582        | .5645  | .5760  | .5745  | .5945        | .5831   | .5741        | .5764  | .5673        | .5745        | .5579   | .6595        | .6028        | <b>.9088</b> | .5490        | .5784        | .5711        | <u>.6735</u> |
| FOREX_cadjpy-hour-High                                             | .6560        | .9837        | .9781        | <u>.9876</u> | <b>.9878</b> | .9852        | .9846        | .9846        | .9856        | .9818        | .9834  | .9838  | .9840  | .9860        | .9848   | .9841        | .9848  | .9594        | .9840        | .9839   | .9868        | .9856        | .9859        | .9801        | .9827        | .9842        | .9825        |
| dis                                                                | .5179        | .5461        | <u>.7099</u> | .6121        | .6259        | .5718        | .7061        | .7096        | .5338        | .5334        | .6243  | .5885  | .6871  | .6880        | .6971   | .7045        | .6990  | .7034        | .7046        | .6586   | .6432        | .6644        | <b>.7118</b> | .6370        | .6290        | .6196        | .6886        |
| svlyine                                                            | .9841        | .9841        | .9841        | <b>.9876</b> | .9866        | .9841        | .9852        | .9841        | .9841        | .9832        | .9837  | .9849  | .9835  | <b>.9876</b> | .9848   | .9839        | .9850  | .9841        | .9841        | .9840   | <b>.9876</b> | .9858        | .9868        | .9840        | .9841        | .9841        | .9868        |
| online_shoppers                                                    | .4995        | .8820        | .9161        | .9454        | .9524        | .9316        | .9309        | .9329        | .9154        | .9112        | .9231  | .9287  | .9329  | .9471        | .9270   | .9357        | .8994  | .9350        | .9315        | .9161   | <b>.9638</b> | .9330        | .9588        | .9220        | .9320        | .9342        | <u>.9600</u> |
| BNG(tic-tac-toe)                                                   | .6529        | .7831        | .7280        | .8121        | .8133        | .8014        | .8153        | .8118        | .8117        | .7703        | .7974  | .7992  | .8127  | .8131        | .8100   | <u>.8153</u> | .8150  | .8139        | .8112        | .8114   | .8080        | .8054        | .7599        | .7841        | <b>.8169</b> |              |              |
| Cardiovascular-Disease-dataset                                     | .8451        | .8459        | .8779        | .9051        | <b>.9063</b> | .8633        | .8803        | .8871        | .8875        | .8905        | .8908  | .8958  | .8864  | .9019        | .8976   | .9032        | .8969  | .8868        | .8989        | .8829   | .8965        | .8998        | <u>.9053</u> | .8910        | .8969        | .8543        | .9025        |
| credit                                                             | .5003        | .6737        | .6878        | <b>.7343</b> | <u>.7340</u> | .7323        | .7335        | .7307        | .7320        | .7284        | .7147  | .7298  | .7315  | .7322        | .7326   | .7321        | .7328  | .6799        | .7321        | .6677   | .7308        | .7317        | .7320        | .7220        | .7254        | .7245        | .7319        |
| FOREX_audsgd-hour-High                                             | .5001        | .6787        | .7098        | <b>.7817</b> | <u>.7796</u> | .7795        | .7580        | .7540        | .6225        | .7319        | .7469  | .7546  | .7554  | .7588        | .7561   | .7556        | .7528  | .7467        | .7550        | .7443   | .7755        | .7578        | .7298        | .7440        | .7693        | .7567        | .7625        |
| waveform-5000                                                      | .5148        | .5254        | .7041        | .6023        | .6158        | .5653        | .6985        | <u>.7092</u> | .5225        | .5146        | .6413  | .5270  | .6562  | .6184        | .6884   | .6909        | .6899  | .6699        | .6512        | .6336   | .7080        | .6146        | <b>.7109</b> | .5150        | .5813        | .5660        | .7019        |
| BNG(cmc)                                                           | .3380        | .8510        | <u>.8628</u> | .8541        | .8596        | .8510        | .8557        | .8623        | .8625        | <b>.8637</b> | .8267  | .8613  | .8602  | .8611        | .8545   | .8588        | .8532  | .8554        | .8119        | .4077   | .8604        | .8609        | .8624        | .8570        | .8591        | .8524        | .8510        |
| page-blocks                                                        | .5146        | .8814        | .6801        | .8610        | .8647        | .8262        | .9527        | .8696        | .8551        | .7515        | .8784  | .8722  | .9211  | .9761        | .9552   | .9674        | .9057  | .7144        | .9517        | .6480   | <u>.9898</u> | .9734        | <b>.9950</b> | .7990        | .8210        | .8563        | .9166        |
| segment                                                            | .4262        | .5574        | .5239        | .5860        | <b>.5893</b> | .5730        | .5790        | .5791        | <u>.5881</u> | .5624        | .5772  | .5819  | .5795  | .5850        | .5829   | .5838        | .5780  | .5273        | .5475        | .5281   | .5823        | .5801        | .5682        | .5399        | .5558        | .5597        | .5462        |
| website_phishing                                                   | .8977        | .9616        | .9565        | <b>.9745</b> | .9667        | .9703        | .9669        | .9668        | .9295        | .8715        | .9527  | .9679  | .9694  | .9671        | .9711   | .9663        | .9661  | .9640        | .9617        | .9638   | .9677        | .9632        | .9668        | .9550        | <u>.9727</u> | .9713        | .9680        |
| baseball                                                           | .1429        | .8896        | .8297        | .9149        | .9202        | .9196        | .9199        | .9186        | .7957        | .8420        | .8792  | .9130  | .9185  | .9137        | .9039   | .9188        | .8906  | .9139        | .9052        | .2404   | .9190        | .9059        | <b>.9277</b> | .8920        | <u>.9234</u> | .9163        | .9221        |
| pendigits                                                          | .5166        | .8672        | .8672        | .8896        | <u>.9043</u> | .8942        | .8731        | .8873        | .8962        | .8873        | .8891  | .8728  | .8895  | .9014        | .8677   | <b>.9087</b> | .8681  | .8972        | .8145        | .8745   | .8950        | .8723        | .8753        | .8728        | .8994        | .8893        | .8937        |
| Gender_Gap_in_Spanish_WP                                           | .9067        | .9254        | <b>.9552</b> | .9398        | .9388        | .9460        | .9254        | .9313        | .9164        | .9239        | .9231  | .9328  | .9289  | .9376        | .9276   | .9358        | .9386  | .9017        | .9306        | .9415   | <u>.9473</u> | .9333        | .9428        | .9370        | .9333        | .9353        | .9291        |
| wine-quality-white                                                 | .1041        | .9909        | .9281        | .9414        | .9913        | .9879        | <b>.9950</b> | <u>.9948</u> | .9807        | .9854        | .9874  | .9947  | .9929  | .9935        | .9935   | .9942        | .9916  | .9924        | .9927        | .2276   | .9943        | .9937        | .9940        | .9941        | .9888        | .9904        | .9932        |
| satimage                                                           | .4884        | .5726        | .5888        | <u>.5987</u> | .5926        | .5959        | <b>.6009</b> | .5961        | .5917        | .5868        | .5874  | .5966  | .5900  | .5986        | .5951   | .5895        | .5957  | .5809        | .5966        | .5884   | .5914        | .5941        | .5925        | .5729        | .5900        | .5902        | .5716        |
| mfeat-fourier                                                      | .4490        | <u>.6337</u> | .5306        | .6242        | .6315        | .6235        | .5779        | .5790        | .5430        | .5235        | .4956  | .5752  | .5498  | .5517        | .6093   | .5586        | .5884  | .5308        | .5531        | .3165   | .6265        | .5327        | .6327        | .6287        | .5795        | .5980        | <b>.6408</b> |
| VulNoneVul <sub>s,10<sup>-1</sup></sub>                            | .2379        | .9075        | .8367        | <u>.9142</u> | .9135        | .9086        | .8993        | .9044        | .8612        | .8654        | .8790  | .8923  | .8979  | .8959        | .8970   | .9045        | .9041  | .8631        | .8953        | .8981   | .9131        | .8947        | .9104        | .9127        | .9077        | <b>.9168</b> | .9098        |
| CookbookReviews <sub>s,10</sub>                                    | .1000        | .8650        | .8350        | .8572        | <b>.8718</b> | .8602        | .8445        | .8597        | .8330        | .8340        | .7742  | .8483  | .8407  | .8523        | .8390   | .8467        | .8388  | .8188        | .8457        | .8425   | <u>.8653</u> | .8555        | .8648        | .8573        | .8363        | .8570        | .8625        |
| kin8nm <sub>s,10<sup>-1</sup></sub>                                | .1021        | <u>.9969</u> | .1059        | .1010        | .1044        | .1023        | .1011        | .1022        | .1011        | .1025        | .1012  | .1023  | .1026  | .1023        | .1020   | .1041        | .1046  | .1025        | <b>.9904</b> | .1015   | .1024        | .1014        | .1036        |              |              |              | .1015        |
| Ailerons <sub>s,10<sup>-3</sup></sub>                              | .1536        | .1491        | .1532        | <b>.1483</b> | <u>.1486</u> | .1488        | .1504        | .1520        | .1497        | .1567        | .1500  | .1498  | .1594  | .1520        | .1544   | .1511        | .1621  | .1546        | .1496        | .1592   | .1549        | .1562        | .1487        |              |              |              | .1498        |
| Superconductivity <sub>s,10</sub>                                  | .2631        | .1205        | .2054        | .1322        | <u>.9017</u> | .1492        | .6877        | .6699        | .9350        | .2620        | .8301  | .7158  | .4072  | .6736        | .6986   | <u>.6677</u> | .7429  | .2619        | .6781        | .1111   | <b>.6639</b> | .6924        | .6968        |              |              |              | .1784        |
| IEEE80211aa-GATS <sub>s,10<sup>-1</sup></sub>                      | .3993        | .2047        | .1696        | .1527        | <b>.1465</b> | .1559        | .1563        | .1572        | .1519        | .3832        | .1641  | .1564  | .3841  | .1554        | .1553   | .2719        | .1627  | .3981        | .1554        | .2377   | .1522        | .1528        | .1576        |              |              |              | <u>.1512</u> |
| house_16HReg <sub>s,10<sup>5</sup></sub>                           | .3427        | .1078        | .1838        | <u>.9958</u> | <b>.9911</b> | .1057        | .1044        | .1050        | .1269        | .3361        | .1276  | .1088  | .3713  | .1065        | .1080   | .1031        | .1127  | .3417        | .1079        | .1478   | .1032        | .1061        | .1038        |              |              |              | .1046        |
| mv <sub>s,10<sup>-2</sup></sub>                                    | .3131        | .8366        | .5894        | .4063        | .3483        | .4478        | .2844        | .2651        | .5025        | .3200        | .5711  | .2896  | .3396  | .2959        | .3136   | <u>.2605</u> | .3459  | .3254        | .3248        | .7772   | <b>.1991</b> | .3168        | .2629        |              |              |              | .6934        |
| compass_reg                                                        | .5300        | .3623        | .4819        | .3136        | <b>.2994</b> | .3278        | .3175        | .3137        | .3483        | .5397        | .3533  | .3187  | .5458  | .3067        | .3123   | .3133        | .3280  | .5404        | .3158        | .5156   | <u>.3054</u> | .3223        | .3102        |              |              |              | .3276        |
| law-school-admission-bianry <sub>s,10<sup>-4</sup></sub>           | .1045        | .1502        | .5423        | .1194        | .8548        | .8319        | .3949        | .1310        | <b>.9159</b> | .1037        | .2076  | .2381  | .1078  | .3095        | .4977   | <u>.1624</u> | .7286  | .1061        | .9692        | .7190   | .2776        | .3633        | .2738        |              |              |              | .3441        |
| KDD                                                                | .5000        | .4146        | .4606        | .3924        | .3903        | .4249        | .4795        | .4519        | .4417        | .5252        | .4469  | .4332  | .1065  | .4468        | .4563   | .4714        | .4491  | .5002        | .4326        | .5126   | <u>.3554</u> | .4108        | <b>.3118</b> |              |              |              | .4357        |
| Large-scale_Wave_Energy_Farm_Sydney_49 <sub>s,10<sup>4</sup></sub> | .4643        | .2308        | .2816        | .3283        | <b>.1620</b> | <u>.2950</u> | .1161        | .6131        | .6391        | .4668        | .1157  | .4143  | .7089  | .2446        | .2870   | .6369        | .6497  | .5142        | .2051        | .2101   | .1929        | .8179        | .1830        |              |              |              | .8706        |
| healthcare_insurance_expenses <sub>s,10<sup>4</sup></sub>          | .1000        | .8591        | .8153        | <b>.7066</b> | <u>.7070</u> | .7168        | .9204        | .8083        | .7371        | .1036        | .7339  | .8121  | .1023  | .7158        | .7812   | .8344        | .8100  | .1044        | .7902        | .1003   | .8765        | .7193        | .7224        |              |              |              | .7330        |
| communities_and_crime                                              | .7019        | .1176        | .1465        | .4923        | .4498        | .6289        | .5998        | .5980        | .5431        | .7202        | .1059  | .5898  | .9119  | .4370        | .5620   | .7411        | .7012  | .6984        | .5841        | .1295   | <b>.3894</b> | <u>.4144</u> | .4740        |              |              |              | .4183        |
| banksFM <sub>s,10<sup>-1</sup></sub>                               | .1250        | .5525        | .6534        | .4665        | .4736        | <b>.4522</b> | .5049        | .4790        | .4677        | .1283        | .5636  | .4869  | .1673  | <u>.4616</u> | .4721   | .4874        | .5219  | .1248        | .4763        | .1116   | .4624        | .5255        | .4699        |              |              |              | .5296        |
| frid <sub>s,10</sub>                                               | .2213        | .1348        | .1380        | <u>.1325</u> | .1336        | .1337        | .1338        | .1425        | .1363        | .2294        | .1530  | .1355  | .3889  | .1369        | .1386   | .1361        | .1366  | .2218        | .1414        | .1449   | .1437        | .1327        | .1390        |              |              |              | <b>.1322</b> |
| archive <sub>s,10<sup>3</sup></sub>                                | .1551        | .4932        | .4088        | .3009        | .2878        | .3195        | .2973        | .2880        | .1549        | .3130        | .2942  | .1588  | .2863  | .2909        | .2876   | .2911        | .1544  | <b>.2848</b> | .3879        | .2925   | <u>.2856</u> | .2921        |              |              |              | .3240        |              |
| avg. rank                                                          | .4958        | .1854        | .2643        | .1079        | .1010        | .1395        | .1022        | .1029        | <u>.1007</u> | .4945        | .1032  | .1041  | .4949  | .1009        | .1018   | .1010        | .1048  | .4935        | .1026        | .1144   | .1017        | <b>.1006</b> | .1011        |              |              |              | .1326        |
|                                                                    | .4612        | .3642        | .4113        | <u>.3443</u> | <b>.3336</b> | .3466        | .3629        | .3936        | .3448        | .4598        | .4307  | .3739  | .4612  | .3907        | .3730   | .3986        | .3598  | .4653        | .3611        | .4067   | .3875        | .3812        | .3944        |              |              |              | .3733        |
| avg. rank                                                          | 23.227       | 16.455       | 18.591       | 8.045        | 7.000        | 10.727       | 10.977       | 11.159       | 13.814       | 21.932       | 18.273 | 12.864 | 17.568 | 8.591        | 11.341  | 10.727       | 13.091 | 18.318       | 12.364       | 19.023  | 7.545        | 10.909       | 8.205        | 15.889       | 12.370       | 13.370       | 9.705        |

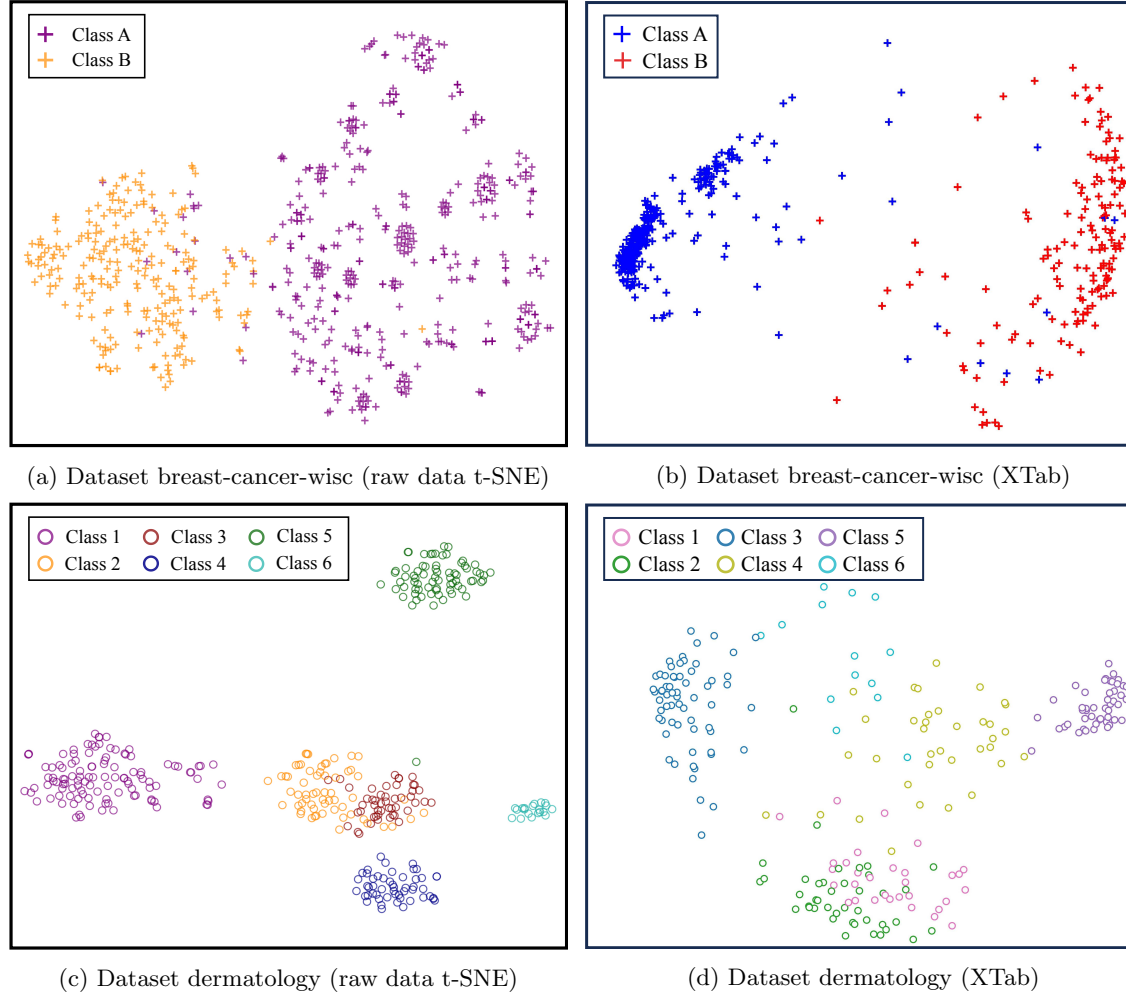

Figure 1: In subfigures (a) and (c), we visualized the distribution of the raw data using t-SNE. To extend visualizations to other methods, we specifically examined XTab, another pre-trained method for tabular data. We applied average pooling to the transformer’s output to obtain a condensed 32-dimensional representation for each sample. These processed representations, which are input into the classification heads, are shown in subfigures (b) and (d). However, the representations from XTab did not show a significant improvement over the raw data. This suggests that much of the representational learning in XTab may rely heavily on the model’s top layers (the classification module), rather than developing robust intermediate representations. In contrast, as shown in Figure 3c of the main paper, the meta-representations generated by TabPTM successfully capture relational patterns within the dataset.

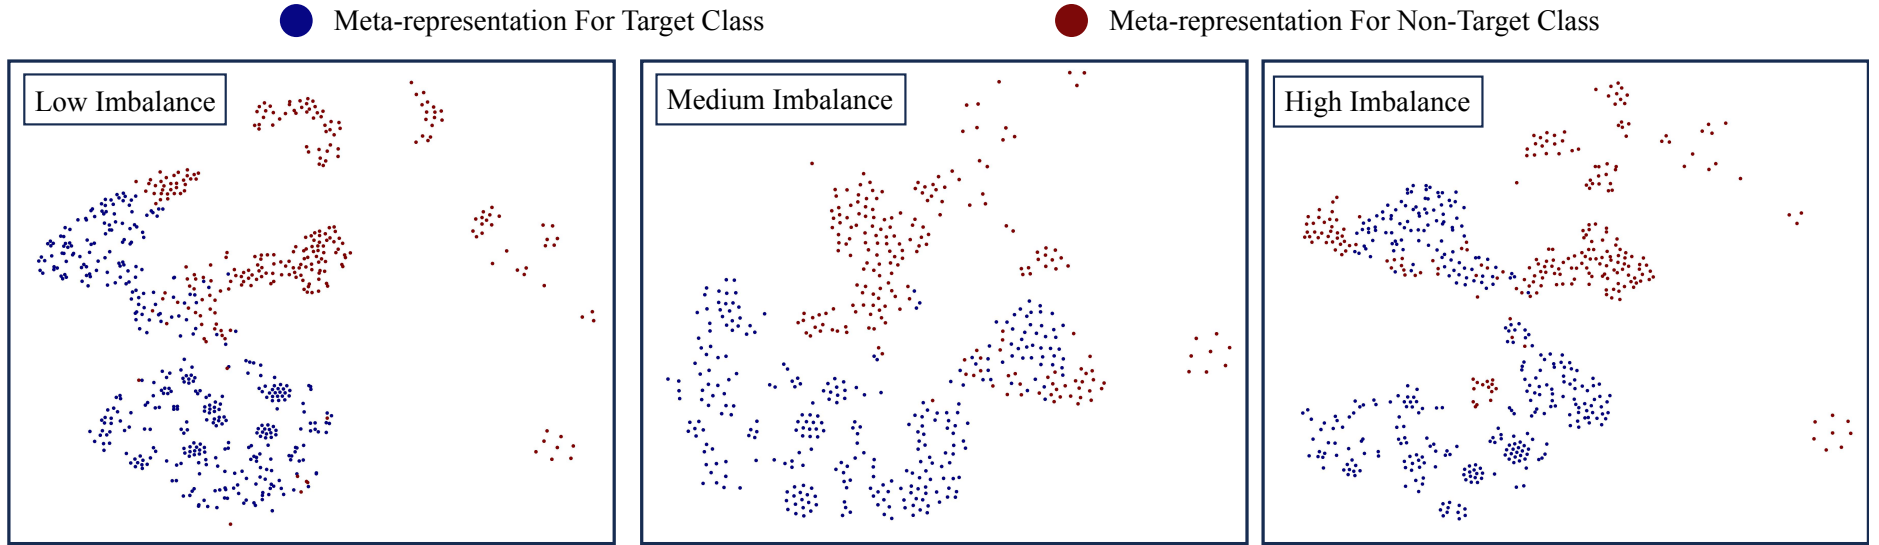

Figure 2: To explore the effect of class imbalance on Meta-representation, we utilized the “breast-cancer-wis” binary classification dataset. We manipulated the dataset to reflect three levels of class imbalance: Low (majority:minority = 0.6), Medium (majority:minority = 0.4), and High (majority:minority = 0.2). The Meta-representations for both the Target and Non-Target classes were visualized under these varying conditions. Despite the imbalance, Meta-representations maintained a good level of discriminative ability. As the imbalance intensified, the discriminative effectiveness for challenging-to-classify samples decreased. This was visually apparent as the red (Target) and blue (Non-Target) points became more intermixed, indicating that the neighboring space, dominated by the majority class, diminishes distinctiveness between classes. The model’s exposure to diverse distributions from large-scale datasets helps it capture essential patterns even under imbalanced conditions. Thus, while class imbalance poses challenges, TabPTM’s performance remains comparatively stable.
